# Supplementary material for: Catalytic asymmetric synthesis of cyclopentenones from propargyl malonates and allylic acetate by successive action of homogeneous palladium(ii) and cobalt on charcoal catalysts in a one-pot reactionElectronic supplementary information (ESI) available: experimental details. See http://www.rsc.org/suppdata/cc/b1/b106836a/
Source: Royal Society of Chemistry journal article supplement (doi:10.1039/b106836a), 2001-11-05
Supplement: b106836a.doc [file b106836a.doc]

#### **Supplementary data**

Catalytic Asymmetric Synthesis of Cyclopentenones from Propargyl Malonates and Allylic Acetate by Successive Action of Homogeneous Palladium(II) and Cobalt on Charcoal Catalysts in a One-Pot Reaction

# Seung Uk Son, Kang Hyun Park, Hwimin Seo, and Young Keun Chung*

School of Chemistry and Center for Molecular Catalysis,

### Seoul National University, Seoul 151-747, Korea

Sueg-Geun Lee

Korea Research Institute of Chemical Technology, PO Box 107, Yusong,

Taejeon 305-600, Korea

Characterizations for new compounds:

Synthesis of 4(Me): Ligand 2 (7.0 mg, 0.019 mmol), [(3-C3H5)PdCl]2 (3.0 mg, 0.0082 mmol), and THF (10 mL) were put into a high-pressure reactor (100 mL). After the resulting solution was stirred at r.t. for 10 min, Co/C (0.20 g, 14 wt% of cobalt), 1,3-diphenyl-2-propenyl acetate (0.20 g, 0.79 mmol), propargyl malonate (0.16 g, 0.81 mmol), BSA (0.25 mL, 1.0 mmol), and a catalytic amount of KOAc were added to the solution. After the solution was stirred at r.t. for 4h, the reactor was pressurized with 30 atm of CO and heated at 130 °C for 12 h. After the reactor was cooled to r.t. and the high pressure was released, the reaction mixture was transferred into a one-neck round-bottom flask (50mL). The solvent was removed by a rotary evaporator and the residue was chromatographed on a silica gel eluting with hexane and ether (v/v, 3:1). Removal of the solvent gave the product in 81% yield (0.286 g, 0.64 mmol). 1H NMR (500 MHz, [D3]chloroform, TMS) d = 7.16-6.79 (m, 10 H), 3.76 (s, 3 H), 3.72 (dm, 18.7 Hz, 1 H), 3.71 (dm, 12.9 Hz, 1 H), 3.58 (m, 1 H), 3.19 (d, 3.2 Hz, 1 H), 3.17 (s, 3 H), 3.01 (dm, 18.7 Hz, 1 H) 1.81 (s, 3 H) ppm; 13C NMR (125 MHz, [D3]chloroform) d = 208.68, 173.96, 171.45, 170.78, 138.60, 136.10, 132.74, 128.61, 128.39, 128.29, 127.91, 127.54, 126.68, 65.65, 58.68, 55.50, 55.01, 35.47, 8.75 ppm; IR ` = 1723 (CO), 1700 (CO) cm-1; HRMS calcd. for C25H24O5: 404.1624; obs: 404.1616. = +181 (c = 0.23 in CH2Cl2, 95 % e.e.).

**4(*n*-Bu)**: 1H NMR (300 MHz, [D3]chloroform, TMS)  = 7.17-7.11 (m, 8 H), 6.80 (m, 2 H), 3.78 (s, 3 H), 3.77 (d, 19.0 Hz, 1 H), 3.72 (dm, 13.0 Hz, 1 H), 3.60 (m, 1 H), 3.22 (d, 3.2 Hz, 1 H), 3.18 (s, 3 H), 3.05 (d, 19.0 Hz, 1 H), 2.50-2.10 (m, 2 H), 1.52 (m, 2 H), 1.40 (m, 2 H), 0.94 (t, 7.2 Hz, 3 H) ppm; 13C NMR (75 MHz, [D3]chloroform)  = 208.3, 173.6, 170.7, 138.7, 136.3, 128.6, 128.4, 128.3, 127.9, 126.6, 65.8, 58.7, 55.6, 55.1, 35.7, 30.2, 23.6, 22.6, 13.8 ppm; IR = 1724 (CO), 1702 (CO) cm-1; HRMS calcd. for C28H30O5: 446.2093; obs: 446.2090. = +133 (c = 1.39 in CH2Cl2, 93% e.e.).

**4(Ph)**: 1H NMR (300 MHz, [D3]chloroform, TMS)  = 7.65 (d, 7.6 Hz, 2 H), 7.46-6.85 (m, 13 H), 4.08 (d, 19.0 Hz, 1 H), 3.80 (m, 2 H), 3.72 (s, 3 H), 3.48 (m, 1 H), 3.23 (s, 3 H), 3.22 (d, 19.0 Hz, 1 H) ppm; 13C NMR (75 MHz, [D3]chloroform)  = 206.5, 175.2, 171.1, 170.9, 138.4, 135.8, 130.7, 128.8, 128.6, 128.5, 128.4, 127.9, 127.6, 126.8, 65.9, 59.9, 55.2, 52.9, 52.5, 37.3 ppm; IR  = 1726 (CO), 1699 (CO) cm-1; HRMS calcd. for C30H26O5: 446.1780; obs: 446.1783. = +35 (c = 1.23 in CH2Cl2. 84% e.e.).

**6(1)**: 1H NMR (300 MHz, [D3]chloroform, TMS)  = 3.80 (s, 3 H), 3.72 (s, 3 H), 3.63 (d, 17.0 Hz, 1 H), 3.44 (br, 1 H), 3.12 (m, 1 H), 2.86 (m, 1 H), 2.84 (d, 17.0 Hz, 1 H), 1.95 (m, 1 H), 1.77 (m, 1 H), 1.74 (s, 3 H), 1.55 (m, 1 H), 0.78 (m, 1 H) ppm; 13C NMR (75 MHz, [D3]chloroform)  = 211.8, 175.9, 172.3, 170.0, 136.6, 62.6, 55.1, 52.9, 52.5, 50.3, 46.2, 34.3, 30.9, 25.3, 8.6 ppm; IR  = 1731 (CO), 1699 (CO) cm-1; HRMS calcd. for C15H18O5: 278.154; obs: 278.1153. = +94 (c = 0.47 in CH2Cl2, 94% e.ee).

**6(2)**: 1H NMR (300 MHz, [D3]chloroform, TMS)  = 3.77 (s, 3 H), 3.76 (s, 3 H), 3.55 (d, 20.0 Hz, 1 H), 3.24 (br, 1 H), 3.05 (d, 20.0 Hz, 1 H), 2.95 (quint, 6.3 Hz, 1 H), 2.72 (m, 1 H), 2.01 (m, 1 H), 1.71 (s, 3 H), 1.64 (m, 1 H), 1.42 (m, 1 H), 1.20 (m, 1 H), 0.94 (m, 1 H), 0.64 (m, 1 H) ppm; 13C NMR (75 MHz, [D3]chloroform)  = 212.9, 174.8, 171.9, 169.6, 130.3, 65.5, 52.9, 52.6, 46.9, 45.3, 42.0, 32.9, 25.1, 23.0, 22.9, 8.7 ppm; IR  = 1730 (CO), 1699 (CO) cm-1; HRMS calcd. for C16H20O5: 292.1311; obs: 292.1317. = -50 (c = 0.48 in CH2Cl2, 72%e.e.).

**6(3)**: 1H NMR (300 MHz, [D3]chloroform, TMS)  = 3.78 (s, 3 H), 3.77 (s, 3 H), 3.45 (d, 17.0 Hz, 1 H), 3.02 (q, 6.0 Hz, 1 H), 2.88 (d, 17.0 Hz,1 H), 2.53 (quint, 6.0 Hz, 1 H), 2.16 (m, 2 H), 2.09 (m, 2 H), 1.95 (m, 1 H), 1.68 (s, 3 H), 1.36-1.07 (m, 4 H) ppm; 13C NMR (75 MHz, [D3]chloroform)  = 210.9, 174.9, 171.5, 171.3, 131.9, 62.3, 52.7, 52.5, 51.9, 48.8, 48.7, 35.1, 30.3, 30.1, 28.1, 27.3, 8.3 ppm; IR  = 1727 (CO), 1699 (CO) cm-1; HRMS calcd. for C17H22O5: 306.1467; obs: 306.1471. = -65 (c = 0.36 in CH2Cl2, 31% e.e.).

**7**: 1H NMR (300 MHz, [D3]chloroform, TMS)  = 3.75 (s, 3 H), 3.70 (s, 3 H), 3.40 (m, 1 H), 3.19 (m, 1 H), 2.83 (m,1 H), 2.68 (m, 2 H), 2.43 (m, 1 H), 2.25 (m, 1 H), 2.13 (m, 2 H), 1.94 (m, 1 H), 1.13 (d, 7.5 Hz, 3 H), 0.90 (m, 1 H) ppm/  = 3.75 (s, 3 H), 3.69 (s, 3 H), 3.38 (m, 1 H), 3.19 (m, 1 H), 2.68 (m, 2 H), 2.13 (m, 2 H), 1.66 (m, 4 H), 1.00 (d, 6.3 Hz, 3 H), 0.78 (m, 1 H) ppm; 13C NMR (75 MHz, [D3]chloroform)  = 223.5, 172.2, 170.2, 63.5, 52.3, 51.2, 50.7, 50.1, 47.9, 42.5, 37.9, 30.2, 28.8, 17.9 ppm/  = 218.9, 171.9, 170.1, 63.2, 52.6, 50.5, 50.0, 47.0, 46.8, 38.6, 33.1, 28.6, 28.5, 9.2 ppm; IR  = 1731(br. S) (CO) cm-1; HRMS calcd. for C15H20O5: 280.1310; obs: 280.1309.

**Measurements of ee values for each reaction**: Daicel OD column was used for all measurements. The details for each measurement are as follows:

For **2(Me)**:solvent, n-hexane/isopropyl alcohol (v/v, 7:3); flow rate**,** 0.7 mL/min; retention time (min), 10.76 (minor), 12.74 (major). For **4(Ph)**:solvent, n-hexane/isopropyl alcohol (v/v, 7:3); flow rate, 0.7 mL/min; retention time (min), 16.08 (minor), 20.91 (major). For **4(*n*-Bu)**: solvent, n-hexane/isopropyl alcohol (v/v**,** 7:3); flow rate, 0.7 mL/min; retention time (min), 6.60 (minor), 7.04 (major). For **6(1):** solvent, n-hexane/isopropyl alcohol (v/v, 95:5); flow rate, 0.7 mL/min; retention time (min), 19.06 (minor), 20.59 (major). For **6(2)**: solvent, n-hexane/isopropyl alcohol (v/v, 7:3); 0.7 mL/min; retention time (min), 7.01 (minor), 7.94 (major). For **6(3)**: solvent, n-hexane/isopropyl alcohol (v/v, 7:3); flow rate, 0.7 mL/min;retention time (min), 5.88 (minor), 6.35 (major).

**NMR studies** : The protons 3 and 4 were assigned by the C-H correlation and long range C-H correlation (the proton 3 has correlation peak with the carbon 1). Because of multi-spin interaction, the NOESY spectrum could not figure out the stereochemistry of the compound. In order to solve the relative stereochemistry, the coupling constants were correlated with dihedral angles in the molecular model. While the coupling constant between the protons 3 and 4 was 3.2 Hz, the coupling constant between the protons 4 and 5 had 12.9 Hz. The molecular model shows that the dihedral angle between the protons 4 and 5 has to be 0 degree to have a coupling constant of 12.9 Hz. Therefore, the protons 4 and 5 have to be in the a position together. Accordingly, the proton 3 can only occupy the b position to have a coupling constant of 3.2 Hz with the proton 4.
